# Supplementary material
Source: MDPI journal article supplement (https://www.mdpi.com/search?q=polymers-11-00220)
Supplement: s001 [file polymers-11-00220-s001.pdf]

## Supporting information

# Fabrication and Application of Dual-Modality Polymer Nanoparticles Based on an AIE-Active Fluorescent Molecule and Magnetic Fe<sub>3</sub>O<sub>4</sub>

Lingyun Wang <sup>1,\*</sup>, Meiyang Huang <sup>1</sup>, Hao Tang <sup>1</sup>, Derong Cao <sup>1</sup> and Yu Zhao <sup>2</sup>

<sup>1</sup> School of Chemistry and Chemical Engineering, South China University of Technology, Guangzhou 510640, China; hmy\_1015@126.com (M.H.); haotang@scut.edu.cn (H.T.); drcao@scut.edu.cn (D.C.)

<sup>2</sup> Shanghai Key Laboratory of Magnetic Resonance and Department of Physics, East China Normal University, 3663 North Zhongshan Road, Shanghai 200062, China; zhaoyu2013022063@163.com

\* Correspondence: lingyun@scut.edu.cn; Tel. +86-20-87110245; Fax: +86-20-87110245

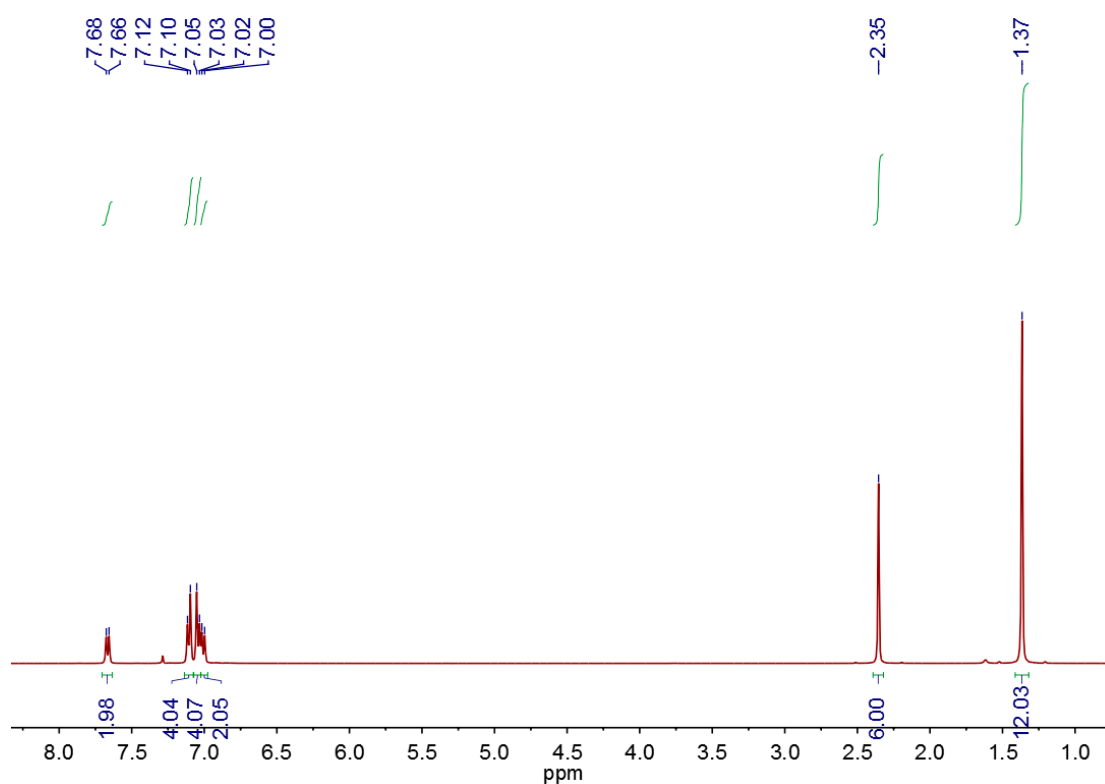

Figure S1. <sup>1</sup>H NMR spectrum of 1a.

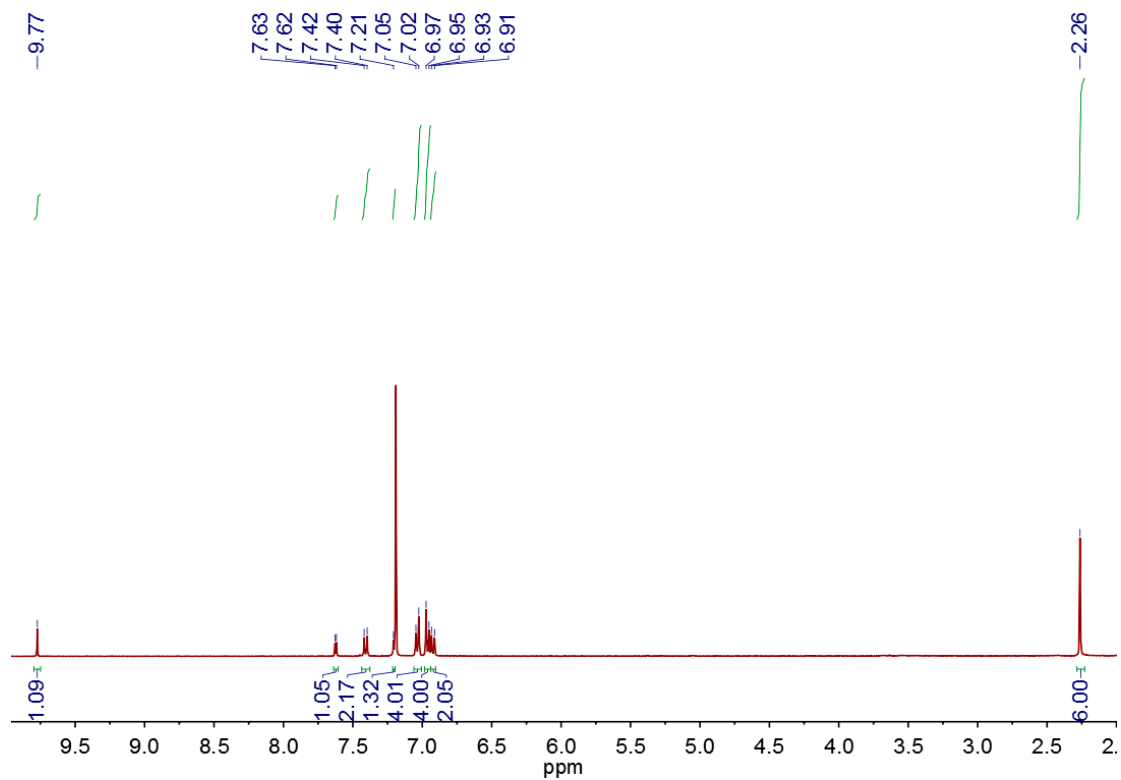

**Figure S2.** <sup>1</sup>H NMR spectrum of **1b**.

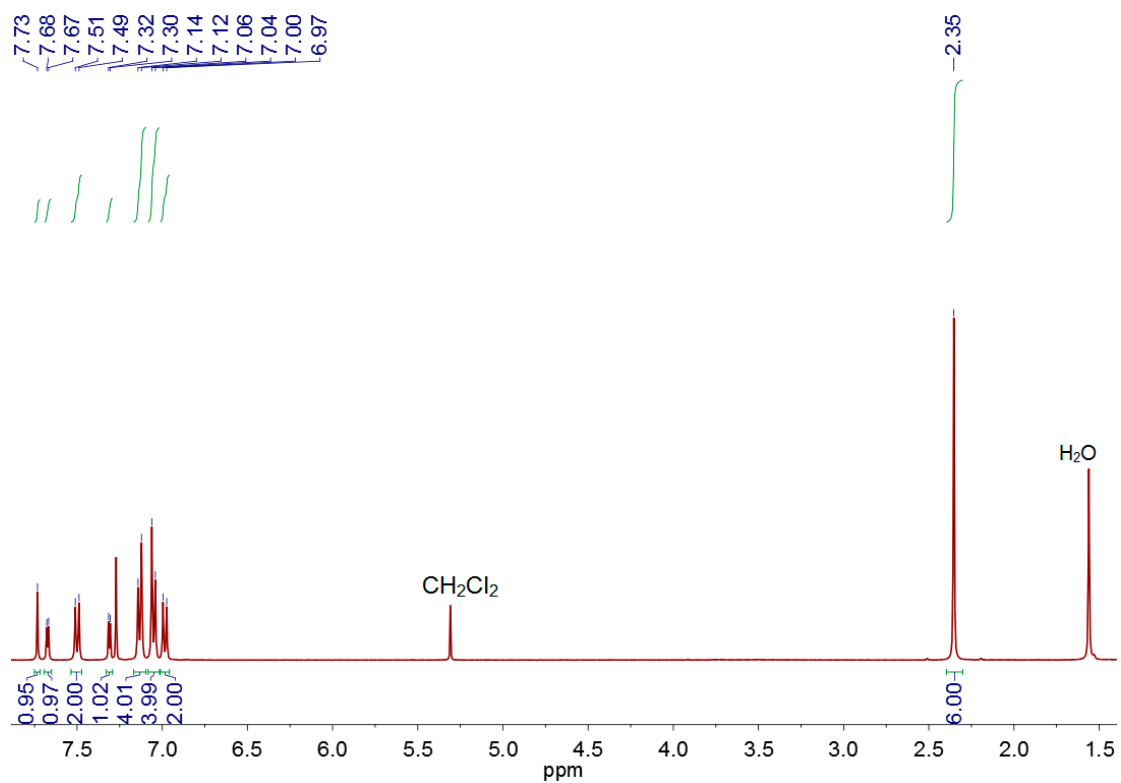

**Figure S3.** <sup>1</sup>H NMR spectrum of **TPAS**.

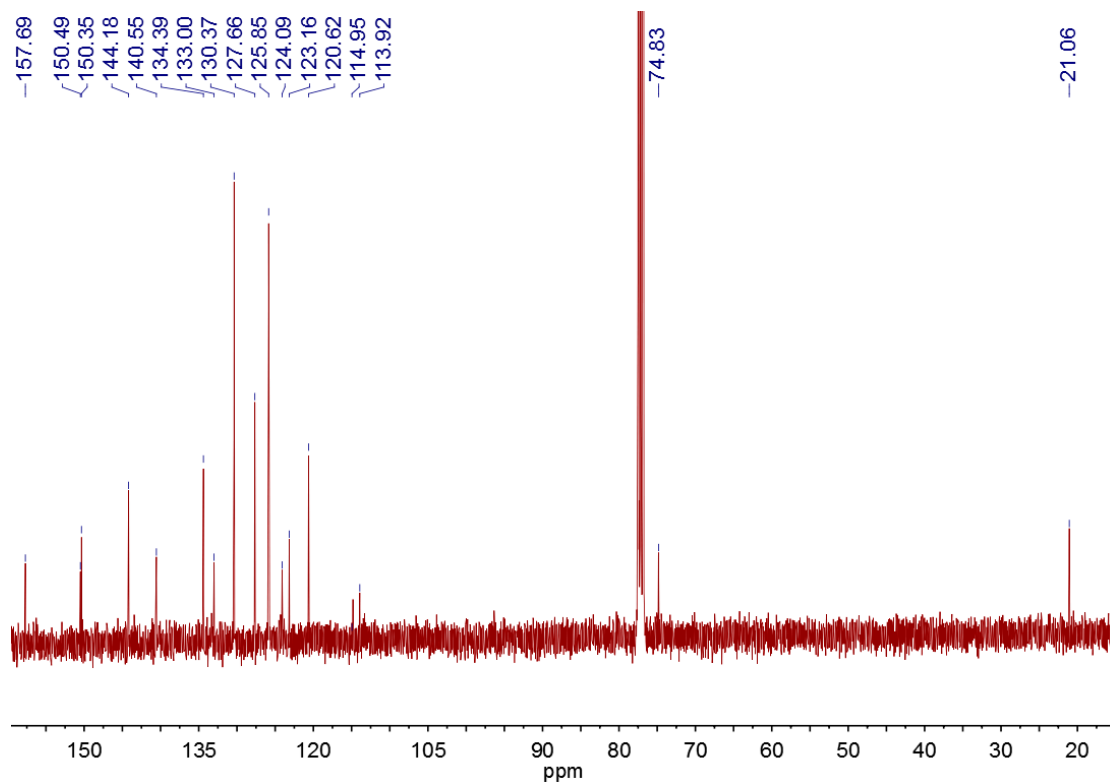

**Figure S4.**  $^{13}\text{C}$  NMR spectrum of TPAS.

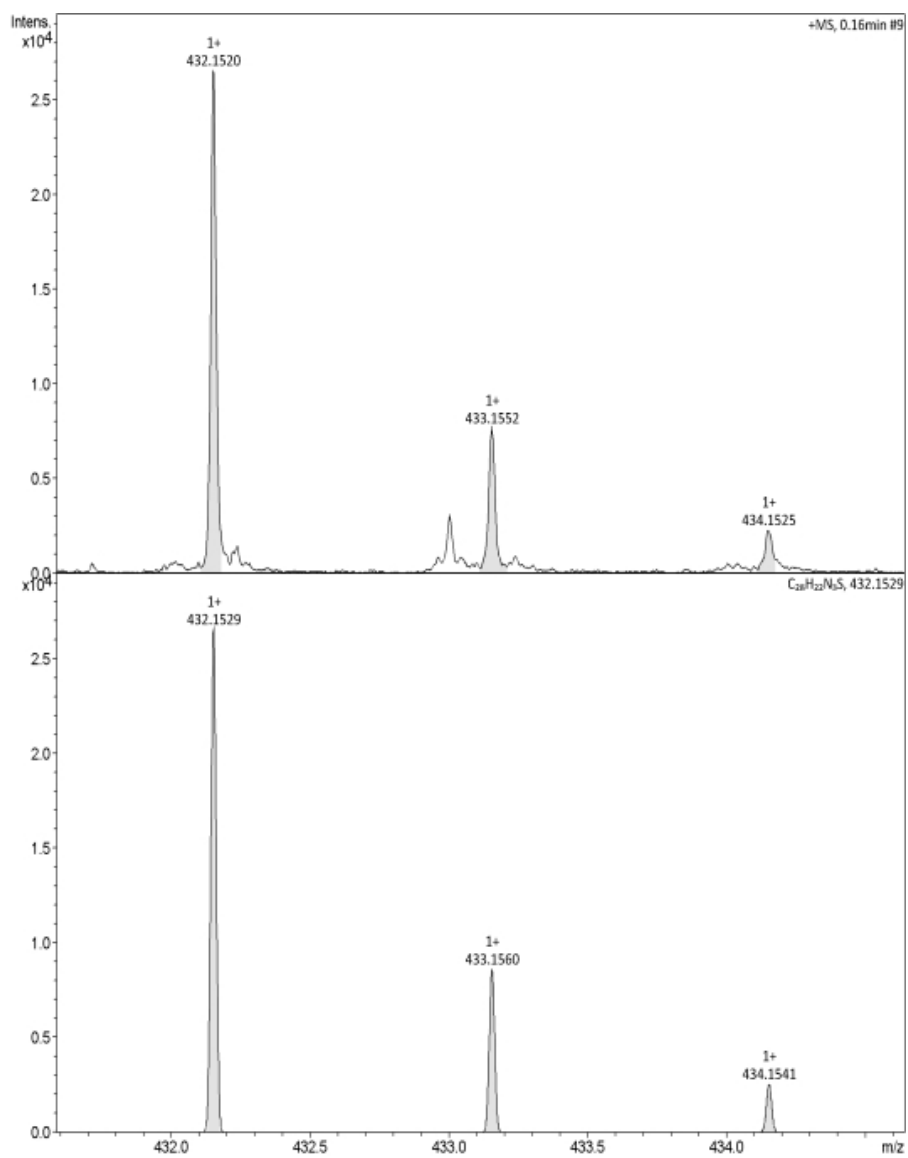

**Figure S5.** HRMS spectrum of TPAS.
